# Supplementary material for: State-dependent central synaptic regulation by GLP-1 is essential for energy homeostasis
Source: Research Square preprint supplement (doi:10.21203/rs.3.rs-3929981/v1), 2024-03-12
Supplement: Supplementary file 1 [file ed8b5d6f735b9150839b09ef.pdf]

# Wang et al. State-dependent central synaptic regulation by GLP-1 is essential for energy homeostasis

## Extended Data Figures and Figure Legends

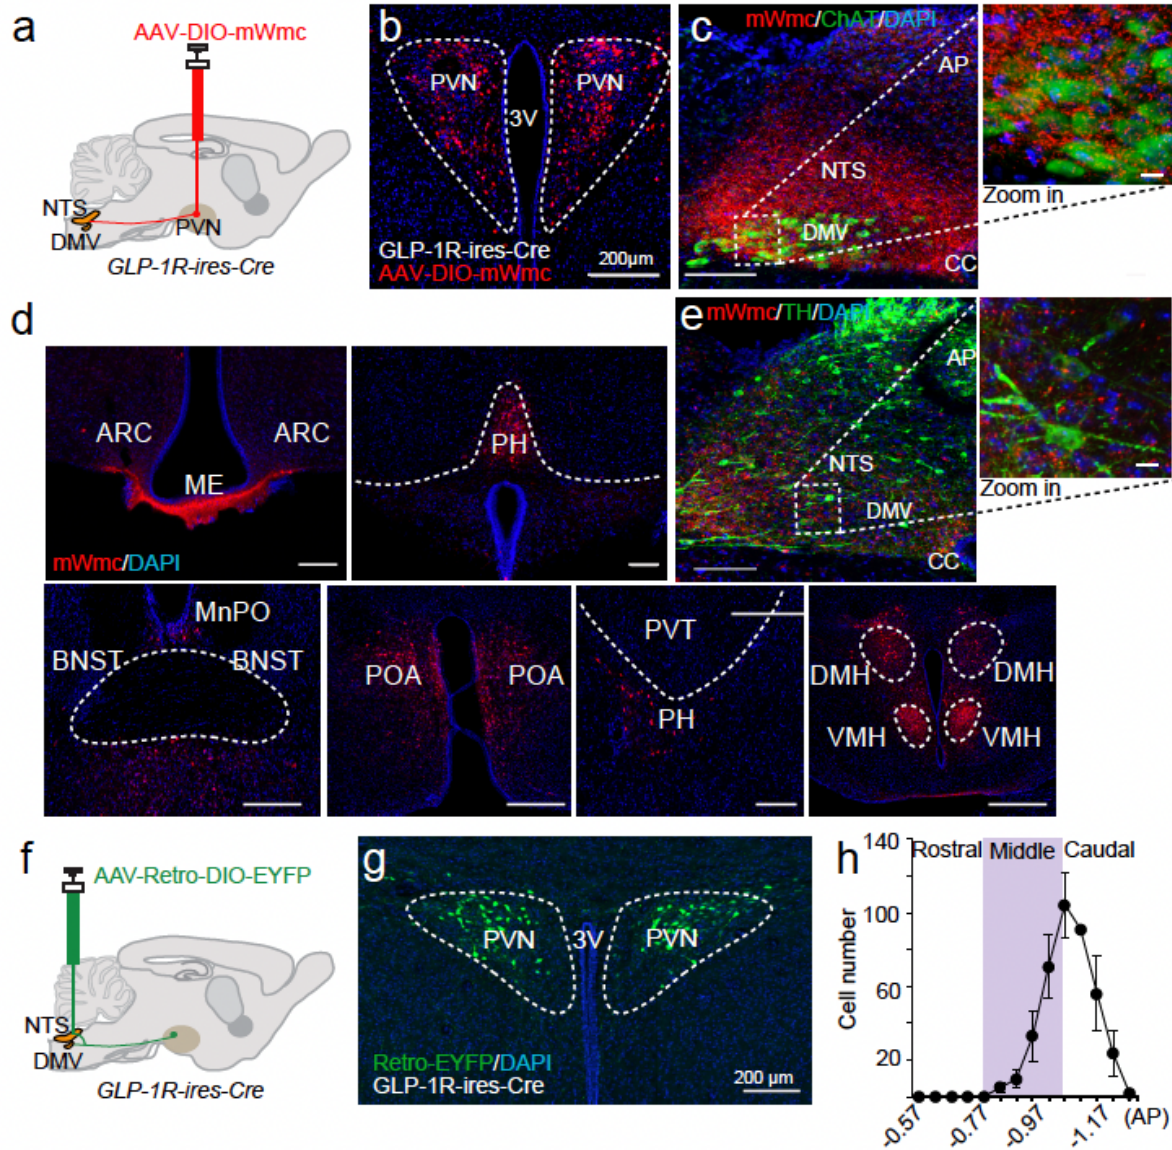

**Extended Data Fig. 1: A survey of targets for PVN GLP-1R neuron projections.** **a.** Experimental paradigm for anterograde trans-synaptic tracing. Trans synaptic AAV-DIO-mWGA-mCherry was injected into the PVN of GLP-1R-ires-Cre mice to map downstream neuronal targets. **b.** Representative image of the PVN section from the animal with AAV-DIO-mWGA-mCherry injections. **c-e.** Representative images of mWGA-mCherry labeling, downstream targets of PVN GLP-1R neurons, in the brain. **f.** Experimental paradigm for retrograde tracing of DVC inputs. AAV-Retro-DIO-EYFP was injected into the DVC in GLP-1-ires-Cre mice. **g.** Representative image of retrogradely labeled PVN GLP-1R neurons that are projecting to the DVC. **h.** Quantification of anterior to posterior sections of PVN<sup>GLP-1R</sup>→DVC neurons (n=3 mice). Data are presented as mean ± standard error of the mean (SEM).

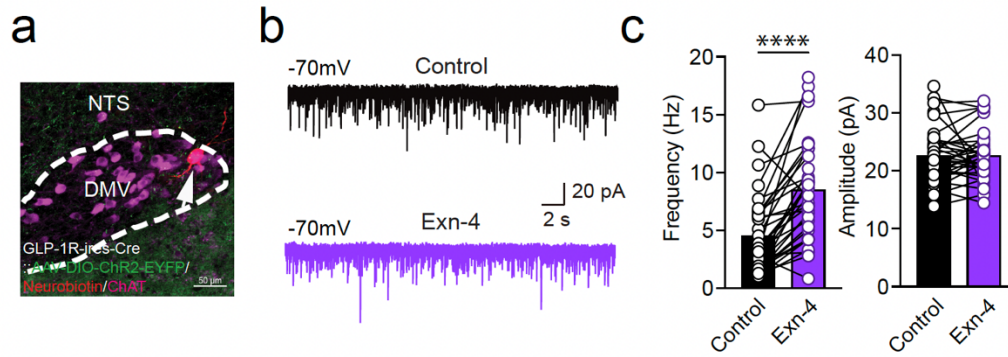

**Extended Data Fig. 2: GLP-1R mediated signaling enhances DVC neuron synaptic inputs.**

**a.** Representative image of recorded DVC neurons labeled with neurobiotin. DMV neurons were visualized with ChAT immunostaining. **b.** Representative traces of sEPSCs with or without Exn-4 (100 nM). **c.** Pooled data of frequency and amplitude of sEPSCs recorded in DVC neurons. (n=34 cells/12 mice). Data are presented as mean  $\pm$  standard error of the mean (SEM). Paired t-tests were used for statistics (**c**). \*\*\*\*p < 0.0001.

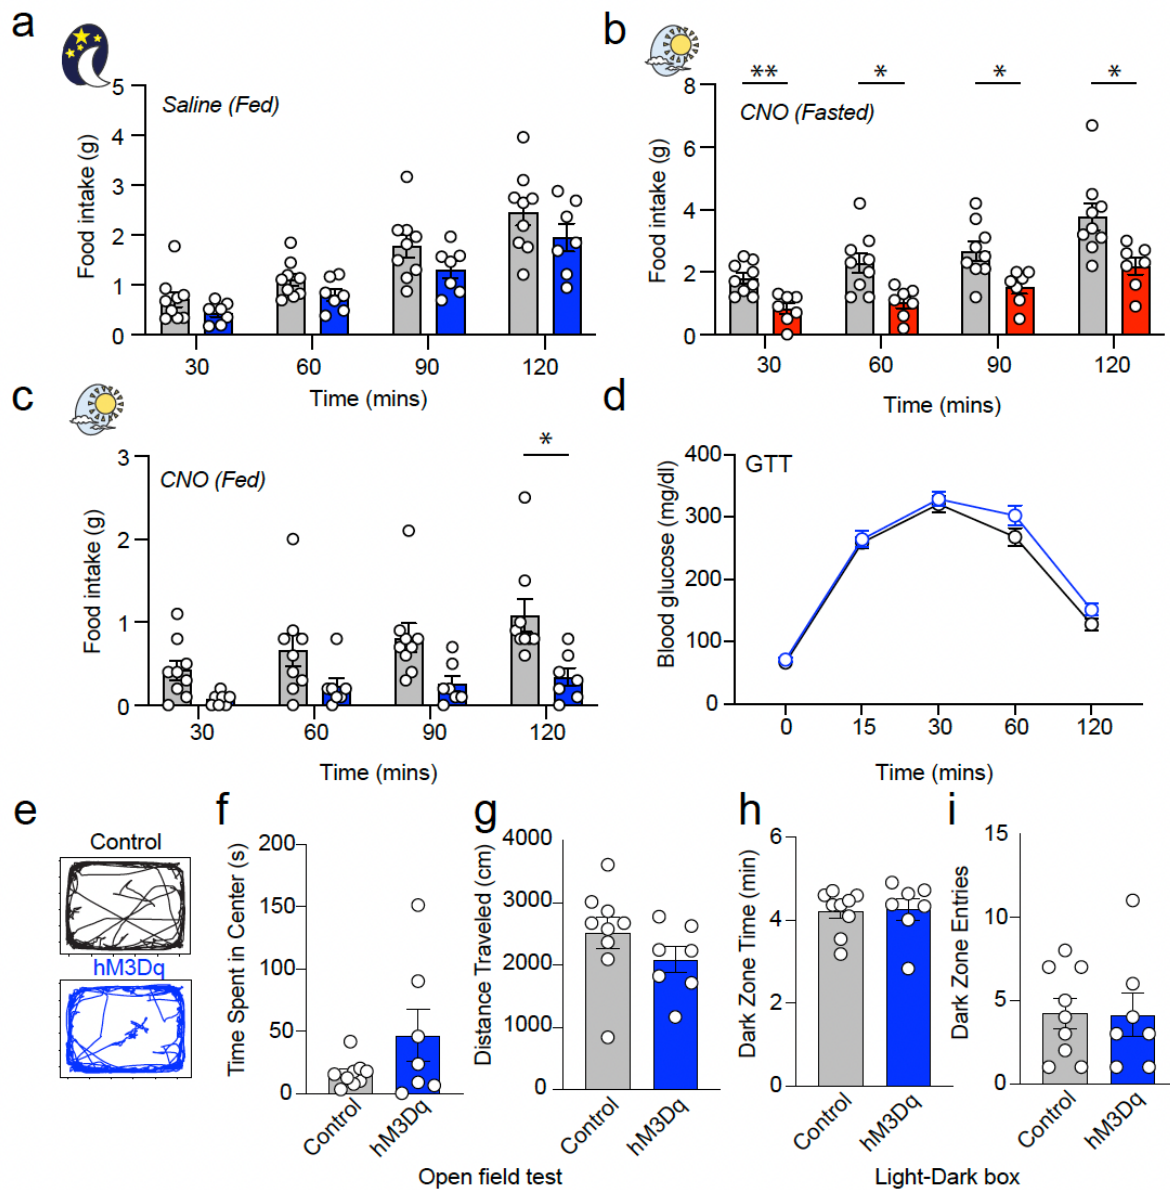

**Extended Data Fig. 3: Chemogenetic activation of PVN<sup>GLP-1R</sup>→DVC neurons via hM3Dq suppresses food intake.** **a-c.** Food intake consumption upon activation of PVN<sup>GLP-1R</sup>→DVC neurons under different energy states and times of the day with or without chemogenetic activation. **d.** Glucose tolerance test with or without chemogenetic activation. **e-g.** Representative traces of animal exploration in the open field with or without chemogenetic activation of PVN<sup>GLP-1R</sup>→DVC neurons (**e**). Time spent in the center (**f**). Total traveled distance (**g**). **h&i.** Quantification of light-dark box assay for anxiety-like behaviors: time spent in dark zone (**h**) and dark zone entries (**i**). Data are presented as mean ± standard error of the mean (SEM). Control n=9 mice, hM3Dq n=7 mice.

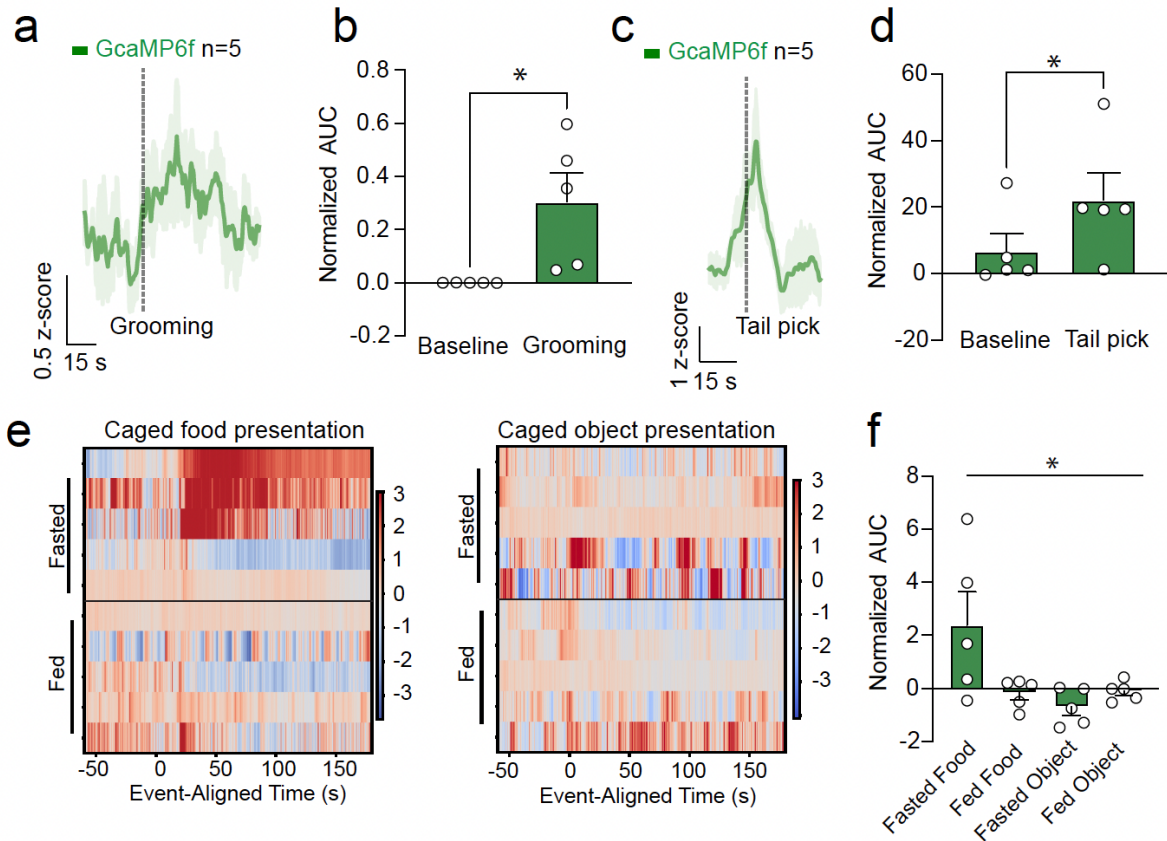

**Extended Data Fig. 4: PVN<sup>GLP-1R</sup>→DVC neurons respond to various sensory inputs. a-b.** Fiber photometry data showing calcium dynamics of PVN<sup>GLP-1R</sup>→DVC neurons during grooming behavior. **c-d.** Fiber photometry calcium dynamics of PVN<sup>GLP-1R</sup>→DVC neurons during tail picking-induced stress. **e-f.** Calcium dynamics of PVN<sup>GLP-1R</sup>→DVC neurons during different food/object tea ball drop stimuli across different energy states. Data are presented as mean ± standard error of the mean (SEM) and n=5 mice; Student's t-test (**b, d**); One-way ANOVA is applied to (**f**). \*p<0.05; \*\*p<0.01.



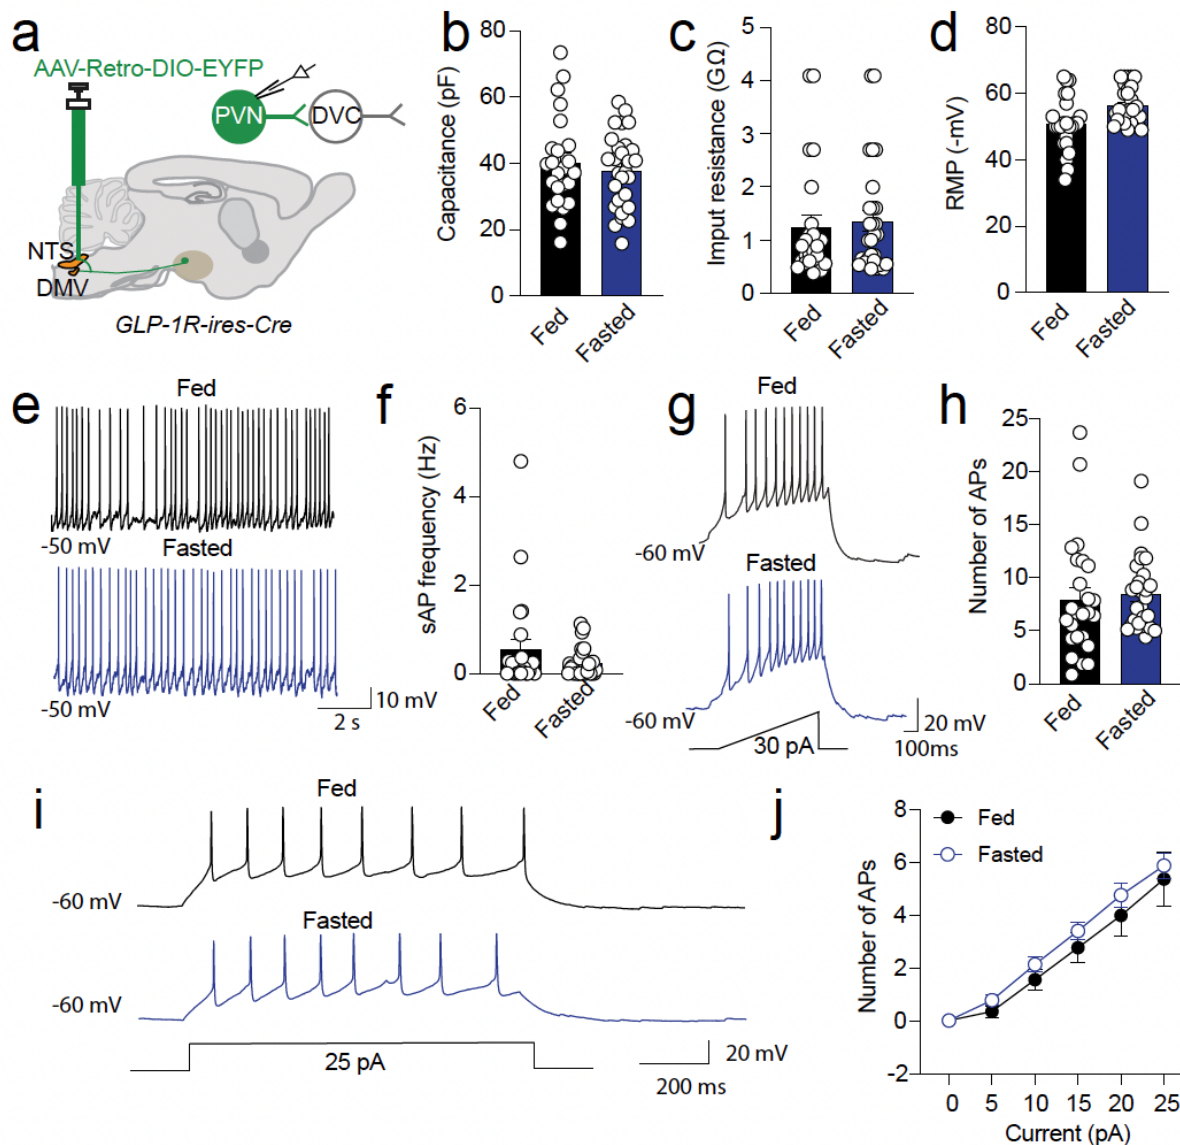

**Extended Data Fig. 5: Electrophysiological characterization of PVN<sup>GLP-1R</sup>→DVC neurons under different energy states.** **a**. Experimental paradigm. **b-d**. Intrinsic electrophysiology characterization of PVN<sup>GLP-1R</sup>→DVC neurons. Summary of capacitance (**b**) (Fed n=24 cells/3 mice, Fasted n=28 cells/3 mice), input resistance (**c**) (Fed n=24 cells/3 mice, Fasted n=28 cells/3 mice), resting membrane potential (**d**) (Fed n=24 cells/3 mice, Fasted n=28 cells/3 mice). **e**. Representative traces spontaneous action potentials (APs). **f**. Pooled data of sAP frequency (Fed n=24 cells/3 mice, Fasted n=28 cells/3 mice). **g**. Representative traces of neurons responding to ramping current injection. Insert show the current injection protocol. **h**. Quantification plot of ramping current injection action potential firing number (Fed n=25 cells/3 mice, Fasted n=27 cells/3 mice). **i**. Representative traces of neurons in response to stepped current injection. Insert show the current injection protocol. **j**. Pooled data plot of the number of APs as a function of injected currents (Fed n=24 cells/3 mice, Fasted n=26 cells/3 mice). Data are presented as mean ± standard error of the mean (SEM).

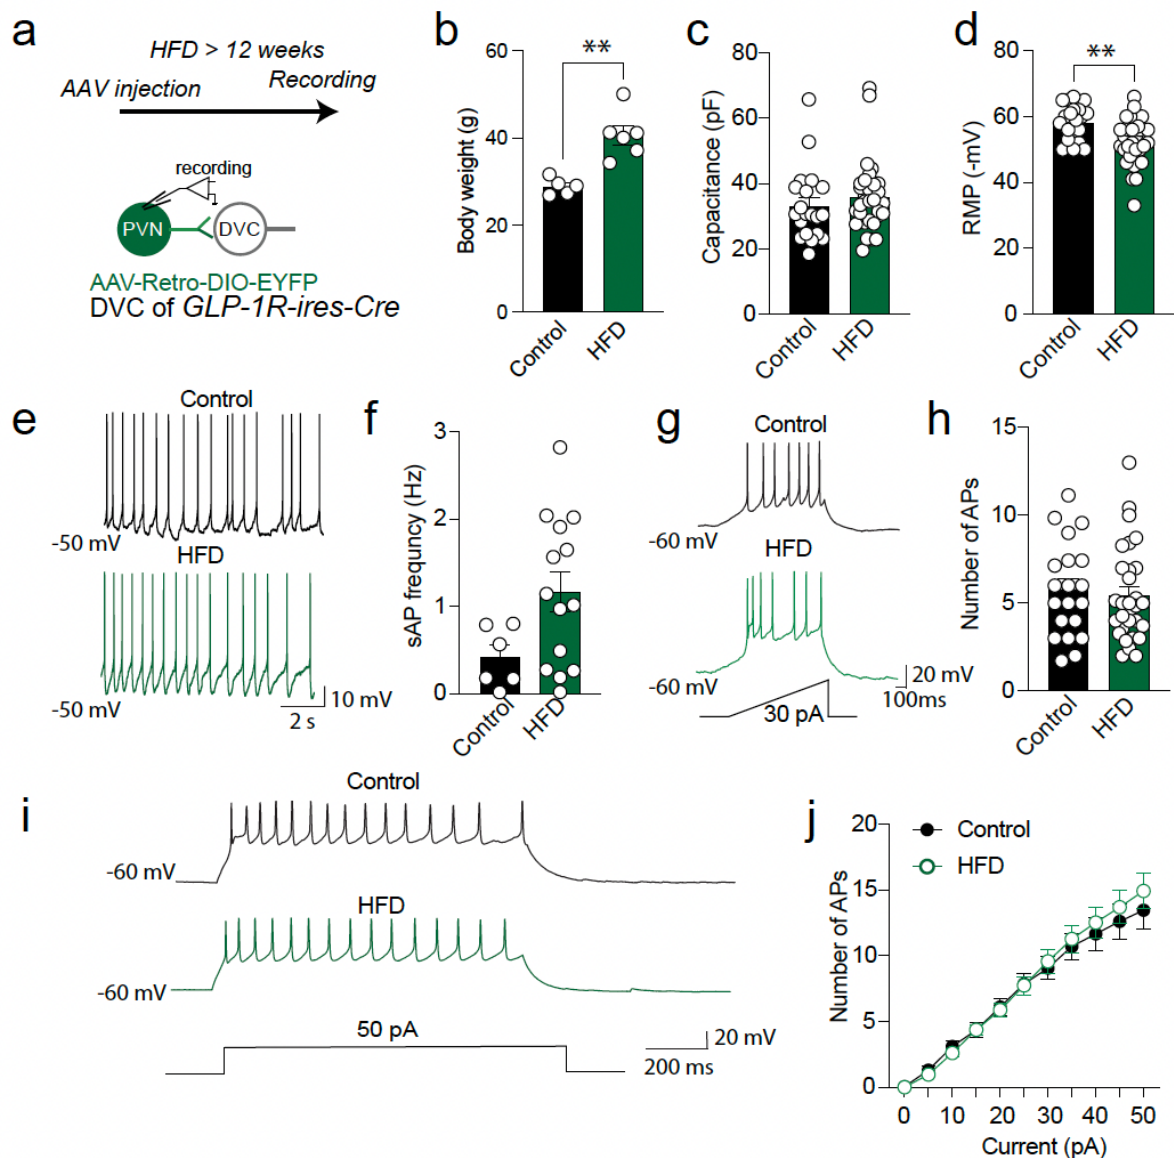

**Extended Data Fig. 6: Electrophysiological characterization of PVN<sup>GLP-1R</sup>→DVC neurons in HFD-induced obesity animals.** **a.** Experimental paradigm. **b.** Body weight of control and HFD-induced obesity animals (Control n=5 mice, HFD n=5 mice). **c-d.** Intrinsic electrophysiology characterization of PVN<sup>GLP-1R</sup>→DVC neurons. Summary of capacitance (**c**) (Control n=20 cells/3 mice, HFD n=32 cells/3 mice) and resting membrane potential (**d**) (Control n=20 cells/3 mice, HFD n=32 cells/3 mice). **e.** Representative traces spontaneous action potentials (APs). **f.** Pooled data of sAP frequency (Control n=6 cells/3 mice, HFD n=14 cells/3 mice). **g.** Representative traces of neurons respond to ramp current injection. Insert show the current injection protocol. **h.** Quantification plot of ramp current injection action potential firing number (Control n=20 cells/3 mice, HFD n=30 cells/3 mice). **i.** Representative traces of neurons in response to step current injection. Insert show the current injection protocol. **j.** Pooled data of plot of the number of APs as a function of injected currents (Control n=20 cells/3 mice, HFD n=30 cells/3 mice). Data are presented as mean ± SEM and sample sizes are indicated in each plot.

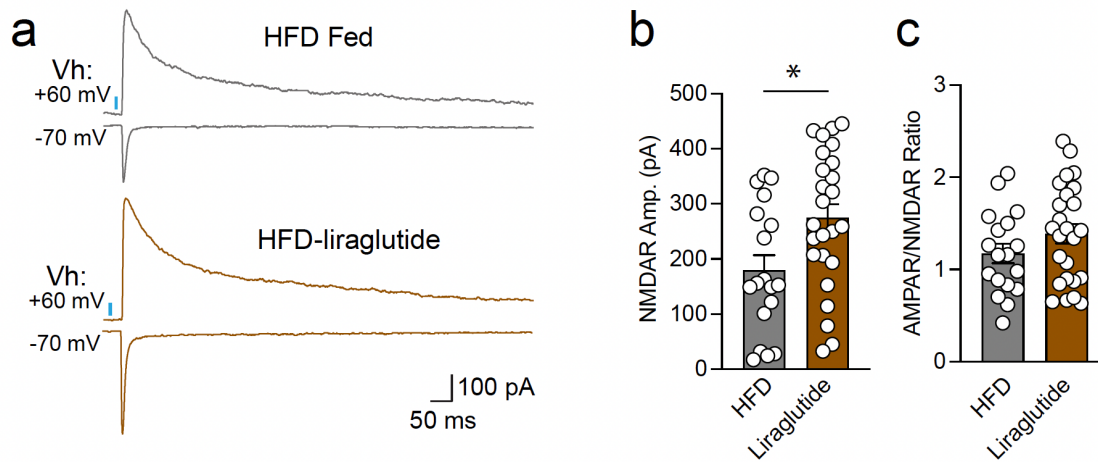

**Extended Data Fig. 7: Liraglutide augments PVN<sup>GLP-1R</sup>→DVC synaptic release in HFD-induced obese animals.** **a.** Representative traces of AMPAR-oEPSCs and NMDAR oEPSCs in HFD-fed induced obese animals with or without Liraglutide (i.p. 400 ug/kg) administering. after i.p. injection of 400 ug/kg liraglutide. **b-c.** Pooled data of NMDAR-oEPSCs (HFD n=18 cells/3 mice, Liraglutide n=25 cells/3 mice). and AMPAR/NMDAR oEPSCs ratio (HFD n=18 cells/3 mice, Liraglutide n=18 cells/3 mice). Data are presented as mean ± SEM. Student's t-test (**b-c**). \*p<0.05.

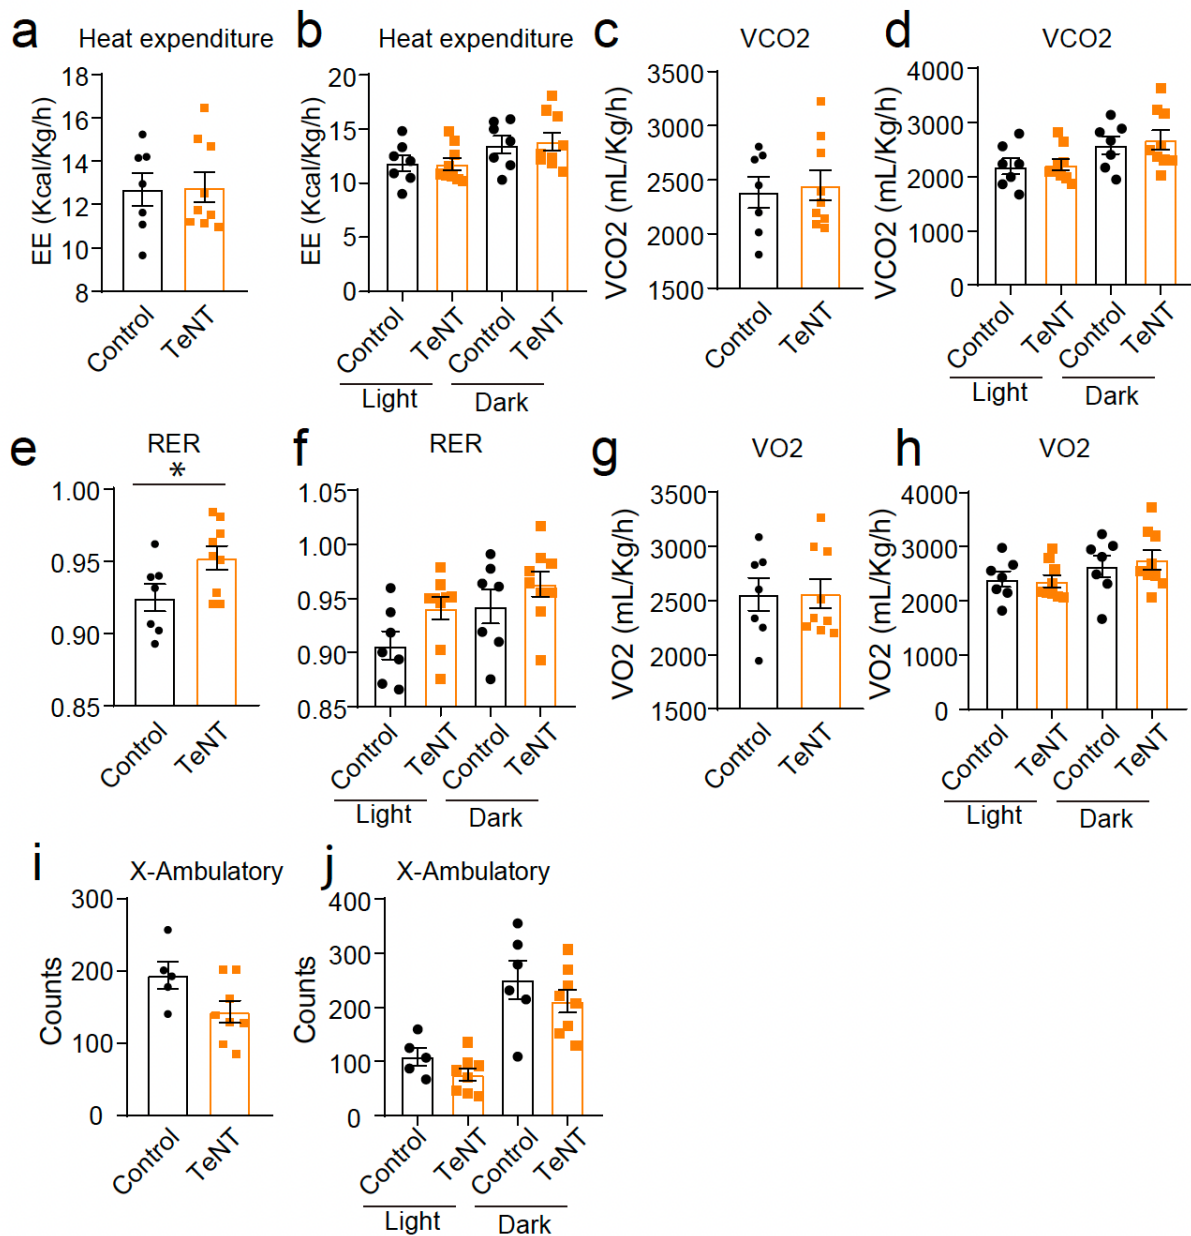

**Extended Data Fig. 8: Comprehensive metabolic analyses of animals after inactivation of PVN<sup>GLP-1R</sup>→DVC synaptic release using Comprehensive Lab Animal Monitoring System (CLAMS).** **a-b.** Average energy expenditure (EE). **c-d.** The volume of carbon dioxide produced (VCO<sub>2</sub>). **e-f.** Respiratory exchange ratio (RER). **g-h.** Oxygen consumed (VO<sub>2</sub>). **i-j.** Average locomotor activity of TeNT and control (GFP) animal. Control n=7 mice, TeNT n=9 mice. Data are presented as mean ± SEM and sample sizes are indicated in each plot; Student's t-test is applied to (e). \*p< 0.05.
